# Supplementary material for: The Development of Ofatumumab, a Fully Human Anti-CD20 Monoclonal Antibody for Practical Use in Relapsing Multiple Sclerosis Treatment
Source: Springer Nature journal article supplement (doi:10.1007/s40120-023-00518-0), 2023-07-14
Supplement: MOESM1 [file 25780056]

## Supplementary Material

The development of ofatumumab, a fully human anti-CD20 monoclonal antibody for practical use in relapsing multiple sclerosis treatment

Stephen L. Hauser<sup>1</sup>, Ludwig Kappos<sup>2</sup>, Amit Bar-Or<sup>3</sup>, Heinz Wiendl<sup>4</sup>, David Paling<sup>5</sup>, Mitzi Williams<sup>6</sup>, Ralf Gold<sup>7</sup>, Andrew Chan<sup>8</sup>, Ron Milo<sup>9</sup>, Ayan Das Gupta<sup>10</sup>, Goeril Karlsson<sup>10</sup>, Roseanne Sullivan<sup>10</sup>, Gordon Graham<sup>10</sup>, Martin Merschhemke<sup>10</sup>, Dieter A. Häring<sup>10</sup>, Patrick Vermersch<sup>11</sup>

<sup>1</sup>UCSF Weill Institute for Neurosciences, University of California, San Francisco, San Francisco, California, USA.

<sup>2</sup>Neurologic Clinic and Policlinic, Departments of Medicine, Clinical Research, Biomedicine and Biomedical Engineering, University Hospital and University of Basel, Basel, Switzerland.

<sup>3</sup>Center for Neuroinflammation and Experimental Therapeutics and Department of Neurology, Perelman School of Medicine, University of Pennsylvania, Philadelphia, PA, USA.

<sup>4</sup>Department of Neurology with Institute of Translational Neurology, University Hospital Münster, Münster, Germany.

<sup>5</sup>Sheffield Institute of Translational Neuroscience, Sheffield Teaching Hospital NHS Foundation Trust, Sheffield, UK.

<sup>6</sup>Joi Life Wellness Multiple Sclerosis Neurology Center, Atlanta, GA, USA.

<sup>7</sup>Department of Neurology, St Josef-Hospital/Ruhr-University Bochum, Bochum, Germany.

<sup>8</sup>Department of Neurology, University Hospital Bern, Inselspital, Bern, Switzerland.

<sup>9</sup>Department of Neurology, Barzilai Medical Center, Ashkelon/Faculty of Health Sciences, Ben-Gurion University of the Negev, Beer-Sheva, Israel.

<sup>10</sup>Novartis Pharma AG, Basel, Switzerland.

<sup>11</sup>Univ. Lille, INSERM U1172 LiNCog, CHU Lille, FHU Precise, F-59000 Lille, France.

**Corresponding author:** Professor Stephen Hauser, UCSF Weill Institute for Neurosciences, University of California, San Francisco, San Francisco, California, USA

Email: [Stephen.Hauser@ucsf.edu](mailto:Stephen.Hauser@ucsf.edu)

Figure S1. Pooled annualized relapse rate data and pooled gadolinium-enhancing lesion data for ASCLEPIOS I/II

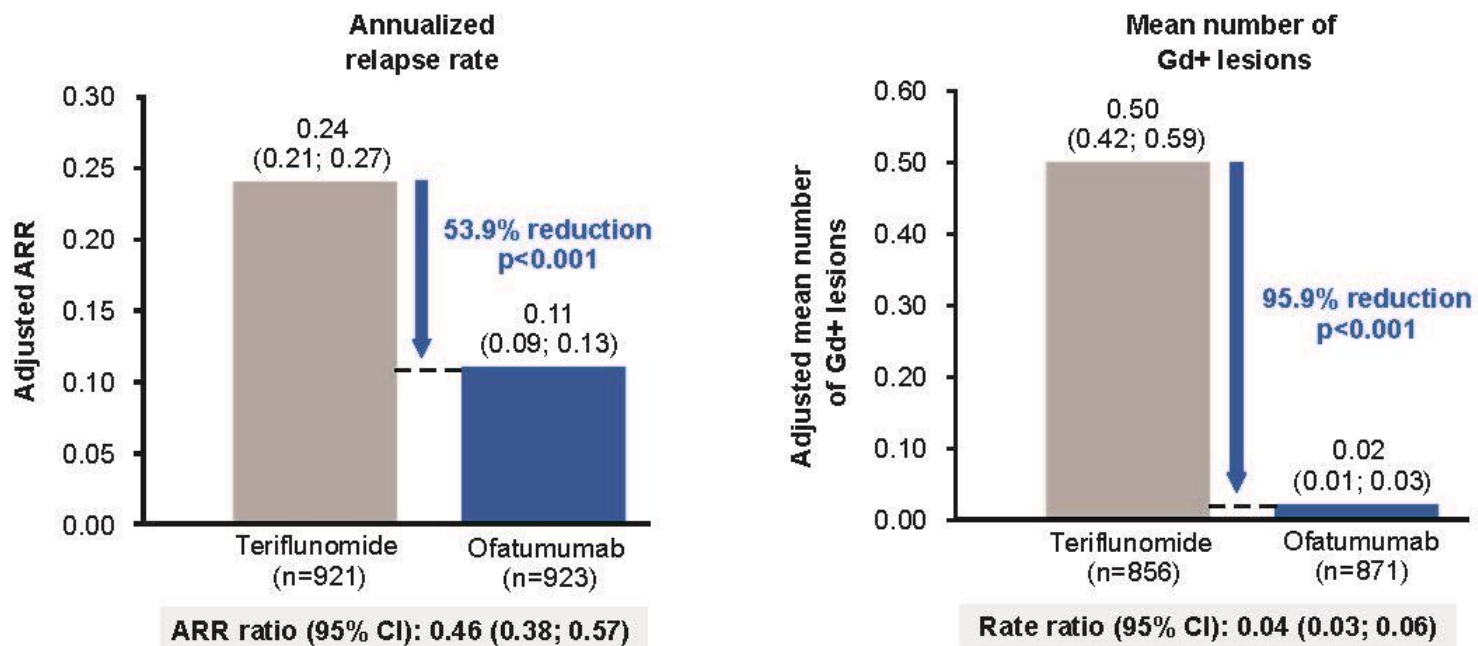

ARR, annualized relapse rate; CI, confidence interval; Gd+, gadolinium-enhancing.
